# Supplementary material
Source: ML conference proceedings conference paper supplement (https://proceedings.neurips.cc/paper_files/paper/2010/hash/a5e00132373a7031000fd987a3c9f87b-Abstract.html)

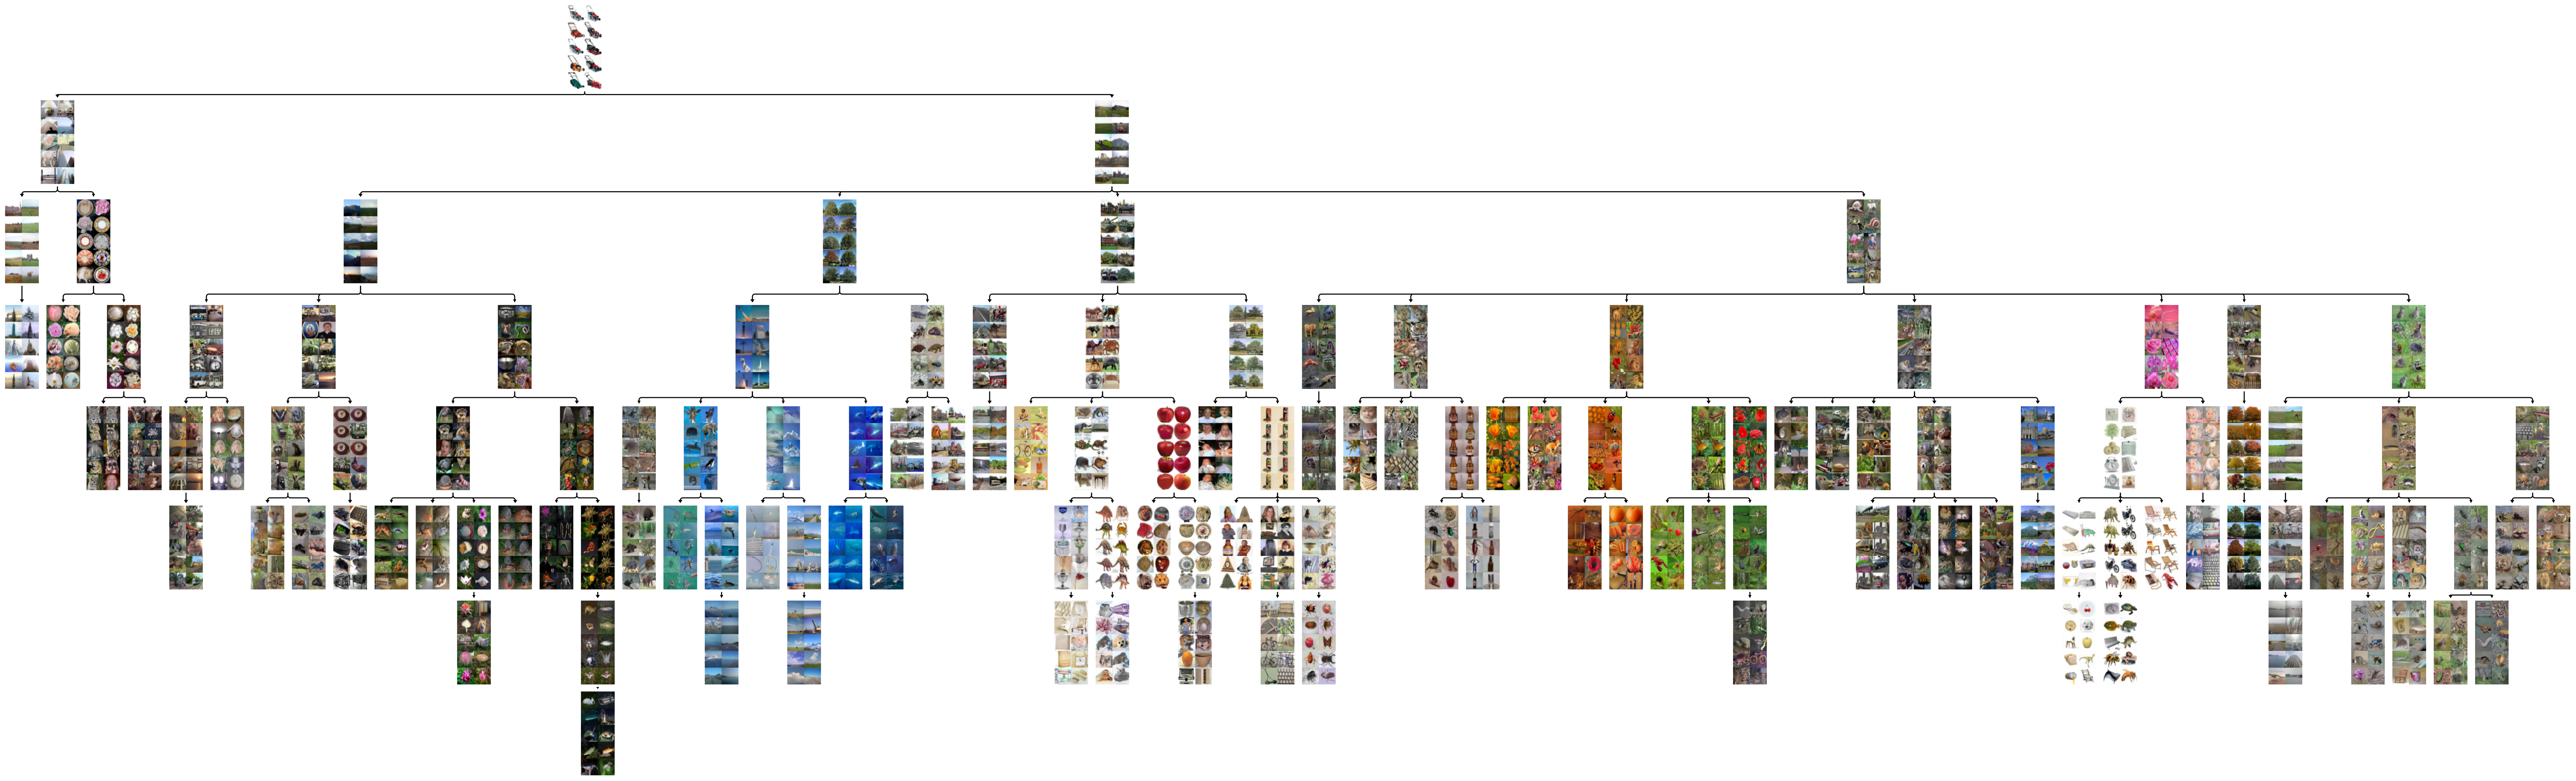

Supplement: Supplementary file [file a5e00132373a7031000fd987a3c9f87b-Supplemental.zip]
